# Supplementary material
Source: PubMed Central journal article supplement (PMC5563925)
Supplement: Supp_Figure1.pdf [file Supp_Figure1.pdf]

## Supplementary Data

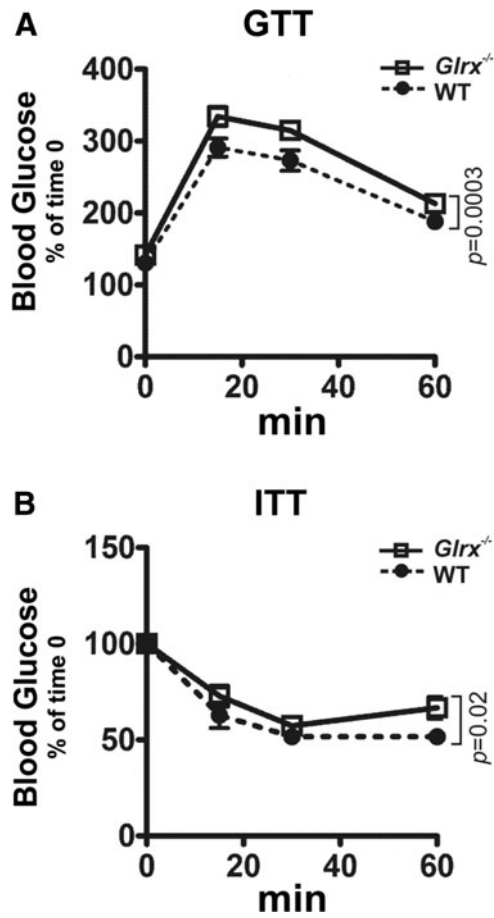

**SUPPLEMENTARY FIG. S1. Glucose homeostasis in WT and  $Glrx^{-/-}$  mice.** (A) GTT and (B) ITT in 8 months old WT and  $Glrx^{-/-}$  mice fed ND. The GTT was performed by injection of 1 mg glucose per gram body weight (BW) into mice fasted overnight. The ITT was performed by injection 0.75 mU insulin per gram BW into mice fasted for 3 h (means  $\pm$  SEM,  $N=8-10$ ). A parametric two-way ANOVA was used to determine statistical significance. BW, body weight; GTT, glucose tolerance test; ITT, insulin tolerance test; ND, normal diet; WT, wild type.
