# Supplementary material
Source: PubMed Central journal article supplement (PMC5563925)
Supplement: Supp_Figure2.pdf [file Supp_Figure2.pdf]

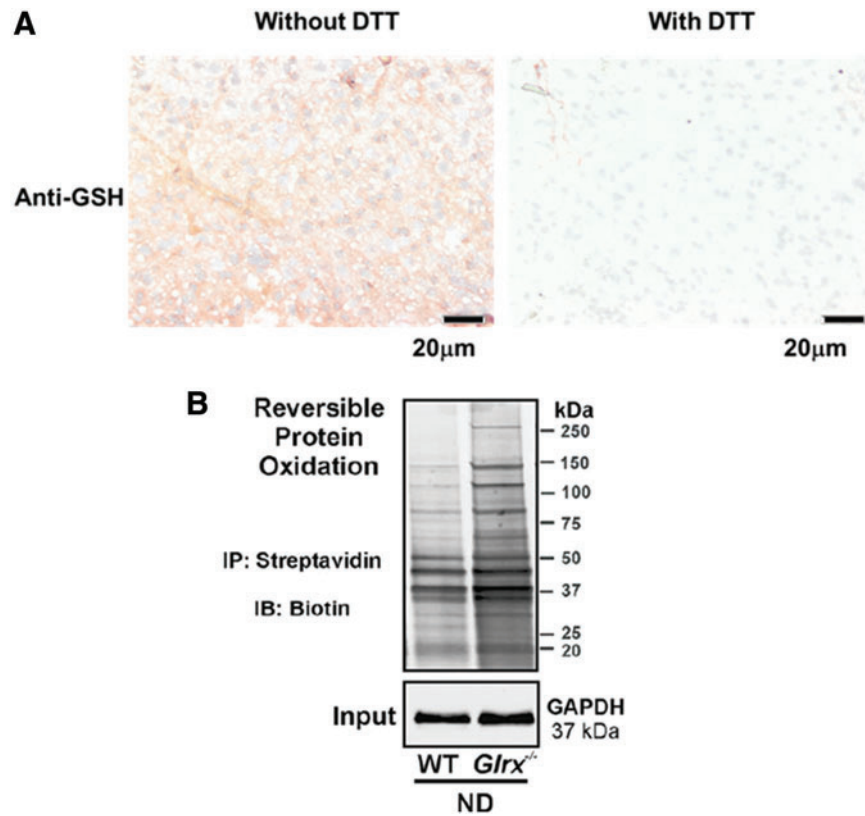

**SUPPLEMENTARY FIG. S2. Protein GSH adducts in liver sections of *Glx*<sup>-/-</sup> mice.** (A) Protein GSH adducts were detected with the anti-glutathione antibody. To remove protein-bound glutathione and reduce cysteines, sections were pretreated with the chemical reductant dithiothreitol (DTT). Nuclei were counterstained with hematoxylin. (B) Representative biotin-switch assay of reversible cysteine oxidation in liver proteins of WT and *Glx*<sup>-/-</sup> mice. GAPDH served as the lysate input control for immunoprecipitation. GSH, glutathione.
