# Supplementary material
Source: PubMed Central journal article supplement (PMC5563925)
Supplement: Supp_Figure3.pdf [file Supp_Figure3.pdf]

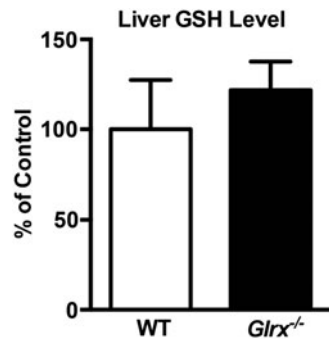

**SUPPLEMENTARY FIG. S3. GSH detection in WT and *Glrx*<sup>-/-</sup> mice liver.** Liver samples were homogenized in borate buffer. Protein was precipitated with perchloric acid containing  $\gamma$ -L-glutamyl-L-glutamic acid as an internal standard. GSH levels in supernatants were measured using HPLC. Samples were normalized using initial liver weight (means  $\pm$  SEM,  $N=3-4$ ). The nonparametric Mann-Whitney  $U$  test was used to determine statistical significance.
