# Supplementary material
Source: PubMed Central journal article supplement (PMC5563925)
Supplement: Supp_Figure4.pdf [file Supp_Figure4.pdf]

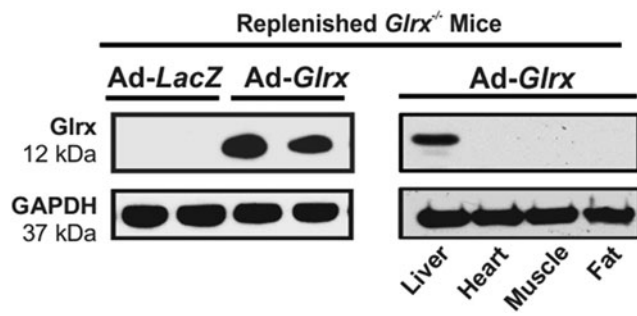

**SUPPLEMENTARY FIG. S4. Expression of replenished *Glx* in *Glx*<sup>-/-</sup> mice.** *Glx* expression in liver (*left panel*) and different organs (*right panel*) 10 days postadenovirus injection into *Glx*<sup>-/-</sup> mice fed ND. Adenoviruses coding for *LacZ* as control or human *Glx* were used for repletion. All mice were fed ND.
