# Supplementary material
Source: PubMed Central journal article supplement (PMC5563925)
Supplement: Supp_Figure5.pdf [file Supp_Figure5.pdf]

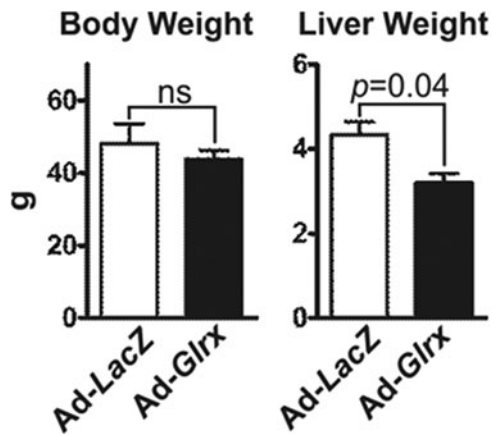

**SUPPLEMENTARY FIG. S5. Glrx replenishment in  $Glx^{-/-}$  mice normalizes liver weight.** Quantification of body and liver weight of  $Glx^{-/-}$  and  $Glx$ -replenished  $Glx^{-/-}$  mice fed ND, 10 days postadenovirus injection (means  $\pm$  SEM,  $N=4-5$ ). The nonparametric Mann-Whitney  $U$  test was used to determine statistical significance.
