# Supplementary material
Source: PubMed Central journal article supplement (PMC5563925)
Supplement: Supp_Figure6.pdf [file Supp_Figure6.pdf]

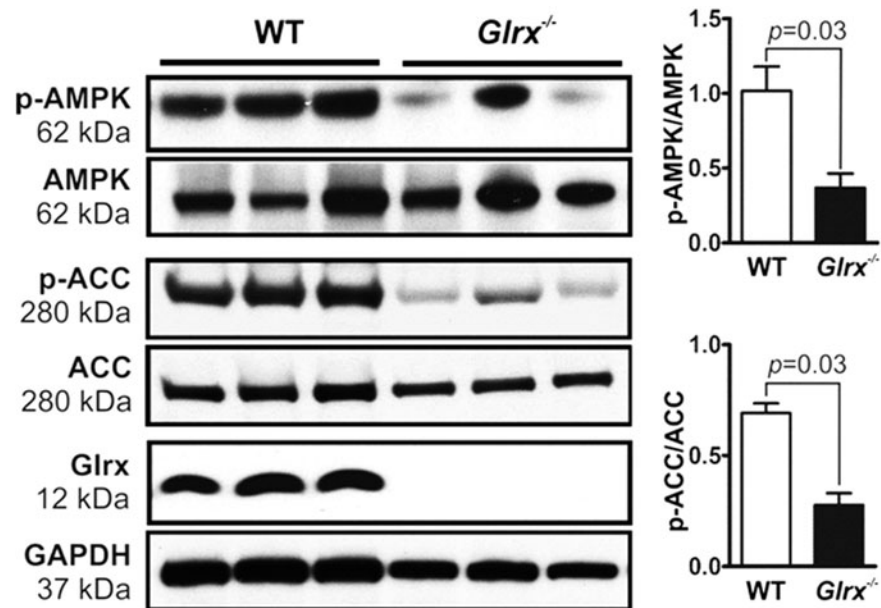

**SUPPLEMENTARY FIG. S6. Phosphorylation of AMPK and ACC activity are decreased in *Glrx*<sup>-/-</sup> mice.** Western blot analysis for expression of phosphorylated-AMP kinase (p-AMPK), total AMPK (AMPK), phosphorylated acetyl-CoA carboxylase (p-ACC), and total ACC (ACC). The semiquantitative ratios of p-AMPK to AMPK and p-ACC to ACC were determined by densitometric analysis of Western blots with ImageJ (means  $\pm$  SEM,  $N=3$ ). The nonparametric Mann-Whitney  $U$  test was used to determine statistical significance.
