# Supplementary material
Source: PubMed Central journal article supplement (PMC5563925)
Supplement: Supp_Figure7.pdf [file Supp_Figure7.pdf]

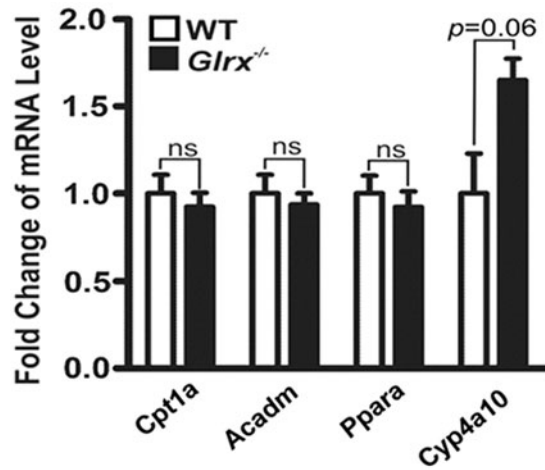

**SUPPLEMENTARY FIG. S7. Liver genes regulating lipid catabolism are unaltered in *Glrx*<sup>-/-</sup> mice.** Quantitative RT-PCR analysis of enzymes involved in hepatic fatty acid catabolism in 8 months old WT and *Glrx*<sup>-/-</sup> mice fed ND. The genes include carnitine plamitoyltransferase (*Cpt*) 1a, acyl-coenzyme A dehydrogenase (*Acadm*), peroxisome proliferator-activated receptor alpha (*Ppara*), and cytochrome P450 (*Cyp*) 4a10. Relative mRNA expression was standardized by  $\beta$ -actin and normalized to the control group (means  $\pm$  SEM,  $N=5-8$ ). The nonparametric Mann-Whitney  $U$  test was used to determine statistical significance.
