# Supplementary material
Source: PubMed Central journal article supplement (PMC5563925)
Supplement: Supp_Figure8.pdf [file Supp_Figure8.pdf]

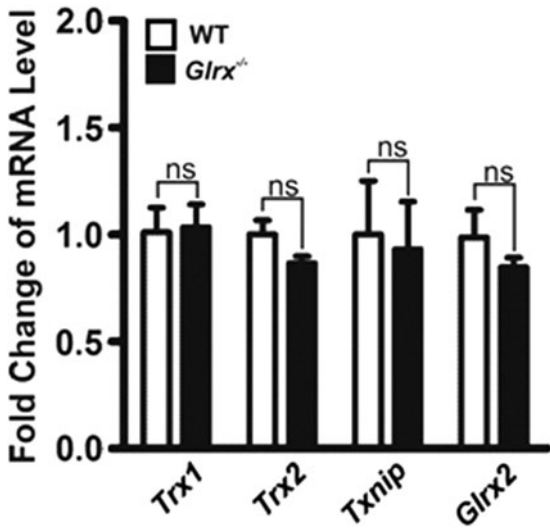

**SUPPLEMENTARY FIG. S8. Liver gene expression of thioredoxins and glutaredoxin 2 is unaltered in *Glrx*<sup>-/-</sup> mice.** Gene expression of glutaredoxin 2 (*Glrx2*) and the thioredoxin family including thioredoxin 1 (*Trx1*), thioredoxin 2 (*Trx2*), and thioredoxin interacting protein (*Txnip*) was measured by quantitative RT-PCR. Relative mRNA expression was standardized by  $\beta$ -actin and normalized to the control group (means  $\pm$  SEM,  $N=5-8$ ). The nonparametric Mann-Whitney  $U$  test was used to determine statistical significance.
