# Supplementary material
Source: PubMed Central journal article supplement (PMC5563925)
Supplement: Supp_Figure9.pdf [file Supp_Figure9.pdf]

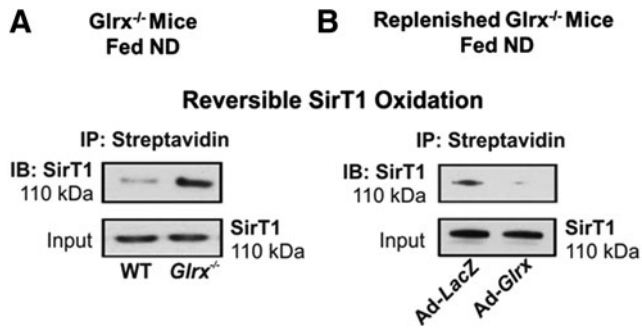

**SUPPLEMENTARY FIG. S9. Reversible cysteine oxidation of endogenous SirT1 increased in *Glx*<sup>-/-</sup> mice fed normal diet.** Livers of WT and *Glx*<sup>-/-</sup> mice (**A**) and *Glx*-replenished *Glx*<sup>-/-</sup> mice (**B**) were labeled according to the biotin-switch protocol and pulled down with streptavidin. Sirtuin-1 was detected by Western blot.
