# Supplementary material
Source: PubMed Central journal article supplement (PMC5563925)
Supplement: Supp_Figure10.pdf [file Supp_Figure10.pdf]

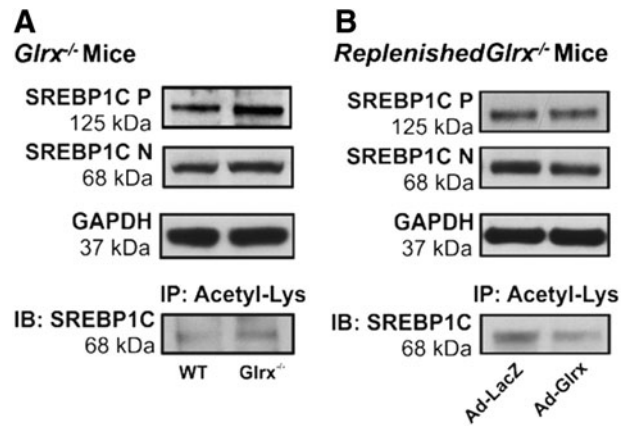

**SUPPLEMENTARY FIG. S10. SREBP1C is regulated via SirT1 in *Glrx*<sup>-/-</sup> mice.** Western blot analysis of SREBP1C precursor (P) and the cleaved nuclear form (N). SirT1 regulates the transcriptional activity of nuclear SREBP1C through acetylation. Acetylated SREBP1C was immunoprecipitated with a pan acetyl lysine antibody and detected by immunoblotting (IB) with the SREBP1C N antibody in livers of WT and *Glrx*<sup>-/-</sup> mice (A) and *Glrx*-replenished *Glrx*<sup>-/-</sup> mice (B). GAPDH served as the lysate input control for immunoprecipitation.
