# Supplementary material
Source: PubMed Central journal article supplement (PMC5563925)
Supplement: Supp_Figure11.pdf [file Supp_Figure11.pdf]

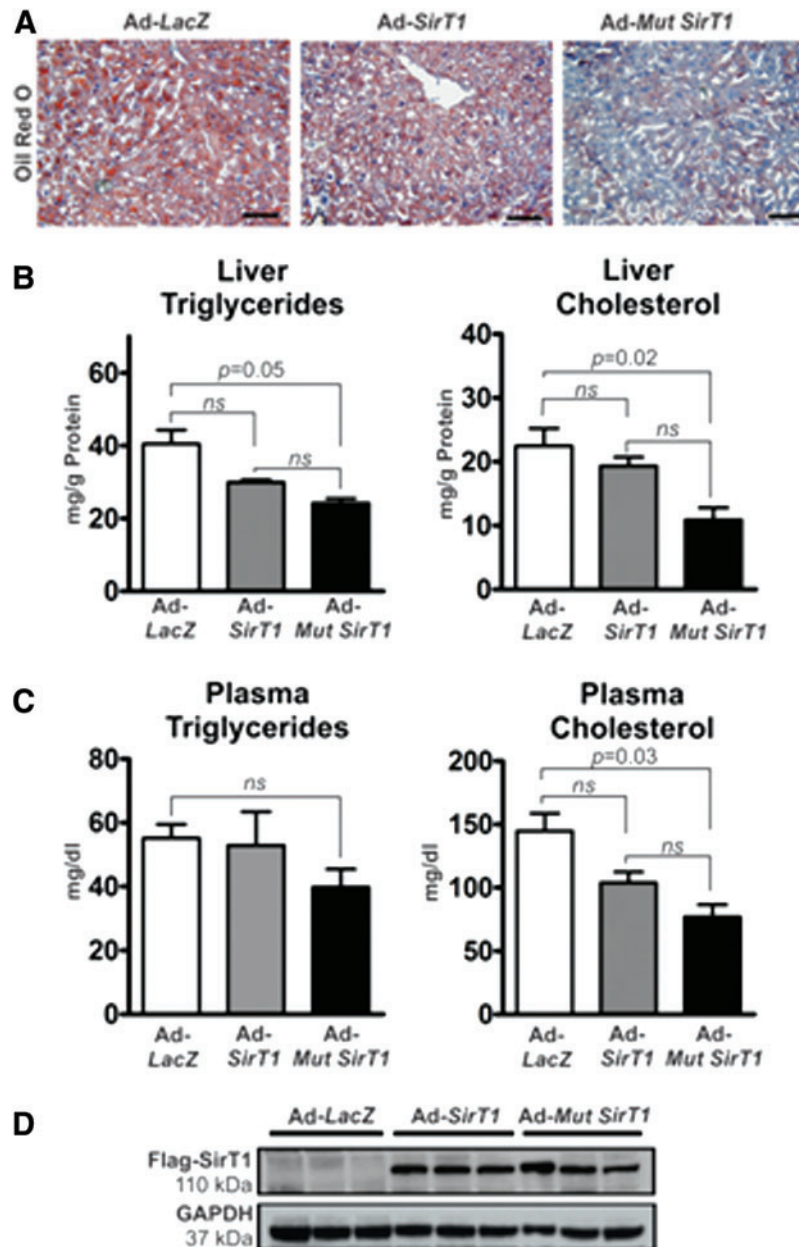

**SUPPLEMENTARY FIG. S11. A nonoxidizable mutant SirT1 protects from *Glrx* deficiency-induced lipid accumulation.** (A) Chow-fed *Glrx*<sup>-/-</sup> mice were injected with adenoviruses coding for WT FLAG-SirT1 (*Ad-SirT1*), mutant SirT1 (*Ad-Mut SirT1*), or LacZ (*Ad-LacZ*). Representative liver sections were stained for lipids with Oil Red O 10 days postadenovirus injection. Scale bars denote 100  $\mu$ m. (B) Levels of liver triglycerides and cholesterol and (C) levels of plasma triglycerides and cholesterol of *Glrx*<sup>-/-</sup> mice injected with *Ad-SirT1*, *Ad-Mut SirT1*, or *Ad-LacZ* (means  $\pm$  SEM,  $N=4-5$ ). The nonparametric Mann-Whitney  $U$  test followed by Dunn's post-test was used to determine statistical significance. (D) Western blot analysis of FLAG-tagged SirT1 expression in livers of *Glrx*<sup>-/-</sup> mice injected with *Ad-SirT1*, *Ad-Mut SirT1*, or *Ad-LacZ*.
