# Supplementary material
Source: PubMed Central journal article supplement (PMC5563925)
Supplement: Supp_Figure12.pdf [file Supp_Figure12.pdf]

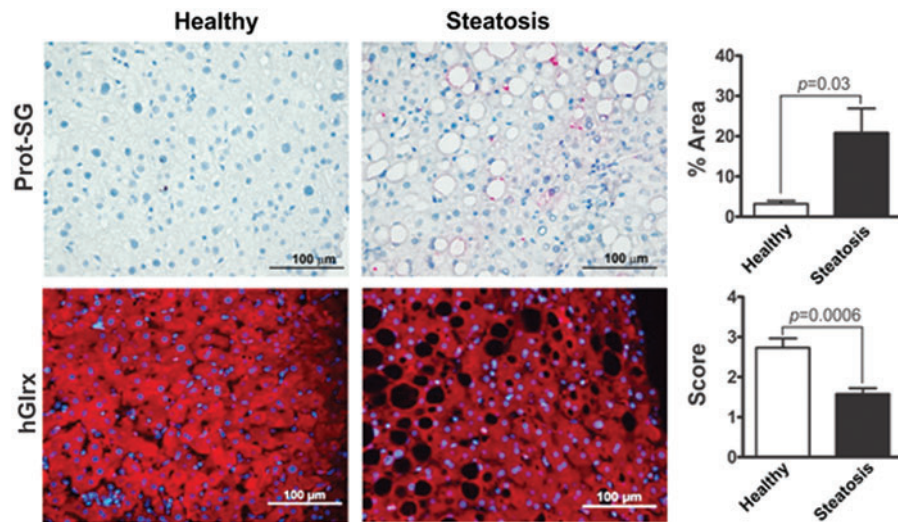

**SUPPLEMENTARY FIG. S12. Hepatic steatosis is associated with increased protein GSH adducts and diminished Glrx expression.** Representative human liver biopsy sections of healthy (*left column*) or steatotic livers (*right column*) were stained with antibodies against protein GSH adducts (Prot-SG) (*upper row*) and human Glrx (hGlrx) (*lower row*). Protein GSH adducts were quantified with the color deconvolution plugin in ImageJ ( $N=3-5/\text{group}$ ). Human endogenous Glrx was quantified with relative scoring (0=no staining, 4=maximal staining) ( $N=3-5/\text{group}$ ). Scale bars denote 100  $\mu\text{m}$ .
