# Supplementary material
Source: PubMed Central journal article supplement (PMC5563925)
Supplement: Supp_Figure13.pdf [file Supp_Figure13.pdf]

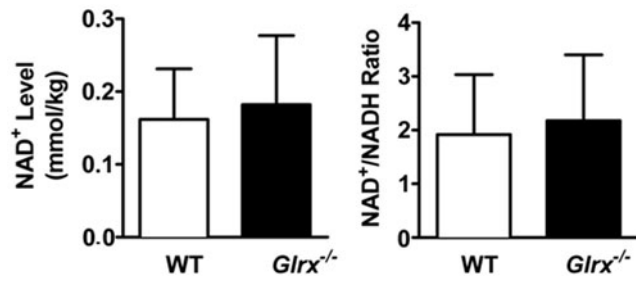

**SUPPLEMENTARY FIG. S13. Hepatic NAD<sup>+</sup>, the SirT1 cosubstrate, and NADH levels remained unchanged in *Glrx*<sup>-/-</sup> mice. (A) Liver NAD<sup>+</sup> levels and (B) NAD<sup>+</sup>/NADH ratio measured in liver homogenates. Samples were normalized to liver weight (means ± SEM, *N* = 3–4). The nonparametric Mann–Whitney *U* test was used to determine statistical significance.**
