# Supplementary material
Source: PubMed Central journal article supplement (PMC5563925)
Supplement: Supp_Figure14.pdf [file Supp_Figure14.pdf]

Figure 2E

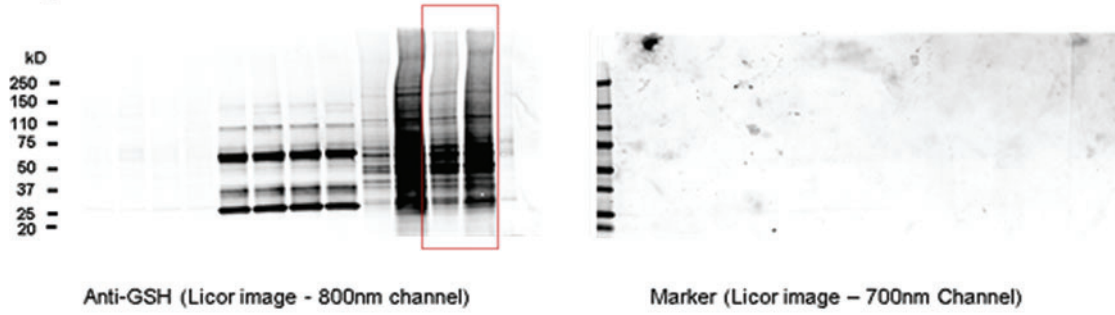

Figure 3B

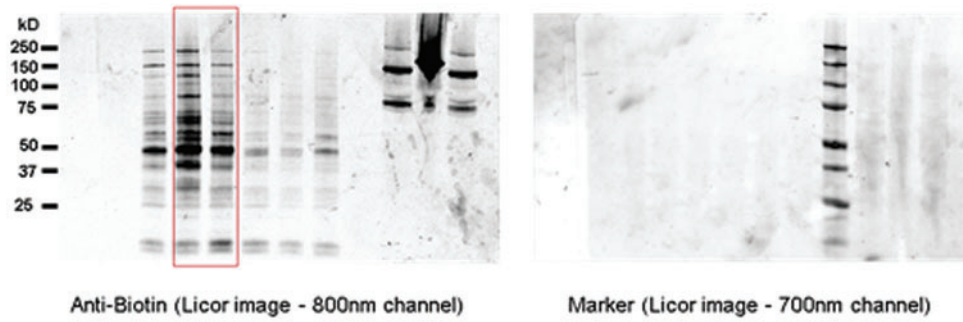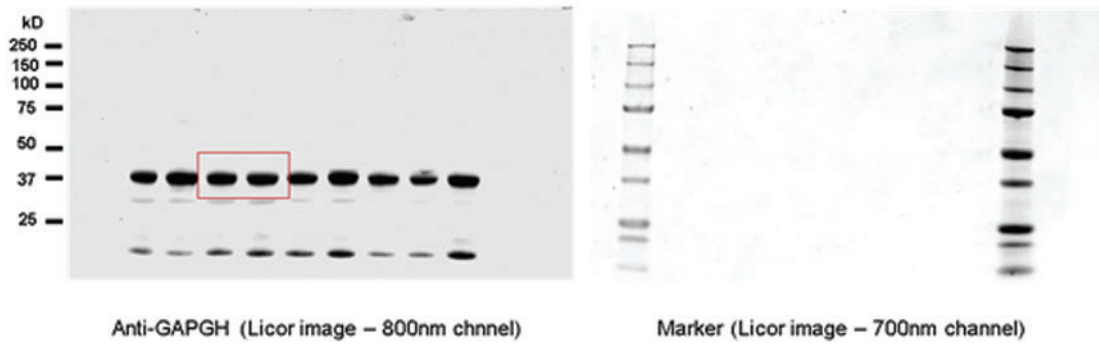

SUPPLEMENTARY FIG. S14. Original Western blots of Figures 2E and 3B. Red boxes delineate cropped area.
