# Supplementary material
Source: PubMed Central journal article supplement (PMC5563925)
Supplement: Supp_Figure15-17.pdf [file Supp_Figure15-17.pdf]

Figure 5A

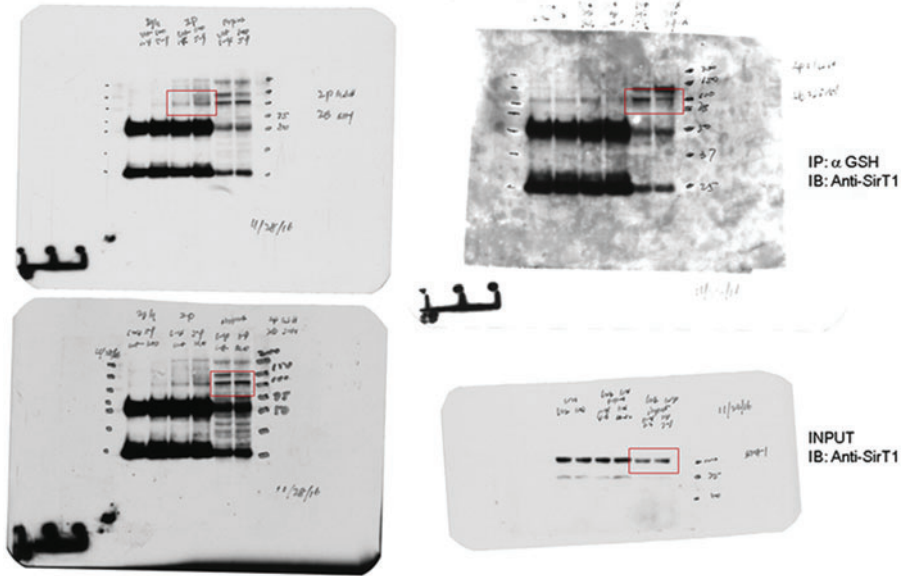

SUPPLEMENTARY FIG. S15. Original Western blots of Figure 5A. Red boxes delineate cropped area.

Figure 5B

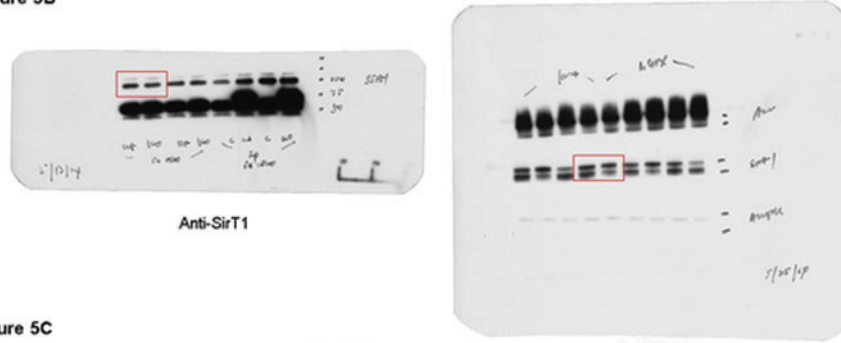

Figure 5C

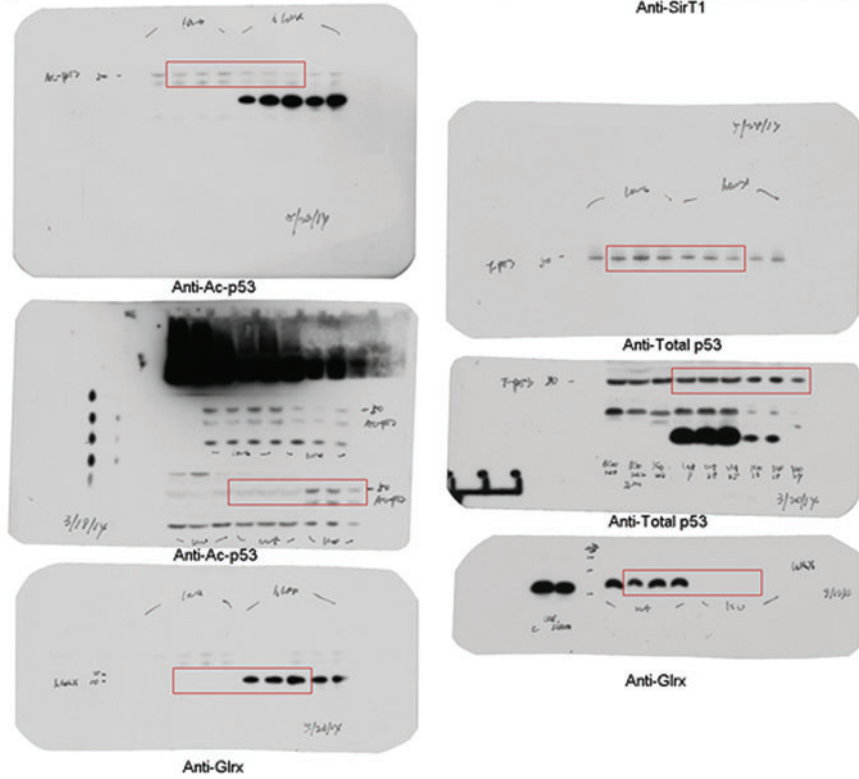

SUPPLEMENTARY FIG. S16. Original Western blots of Figure 5B, C. Red boxes delineate cropped area.

Figure 5D

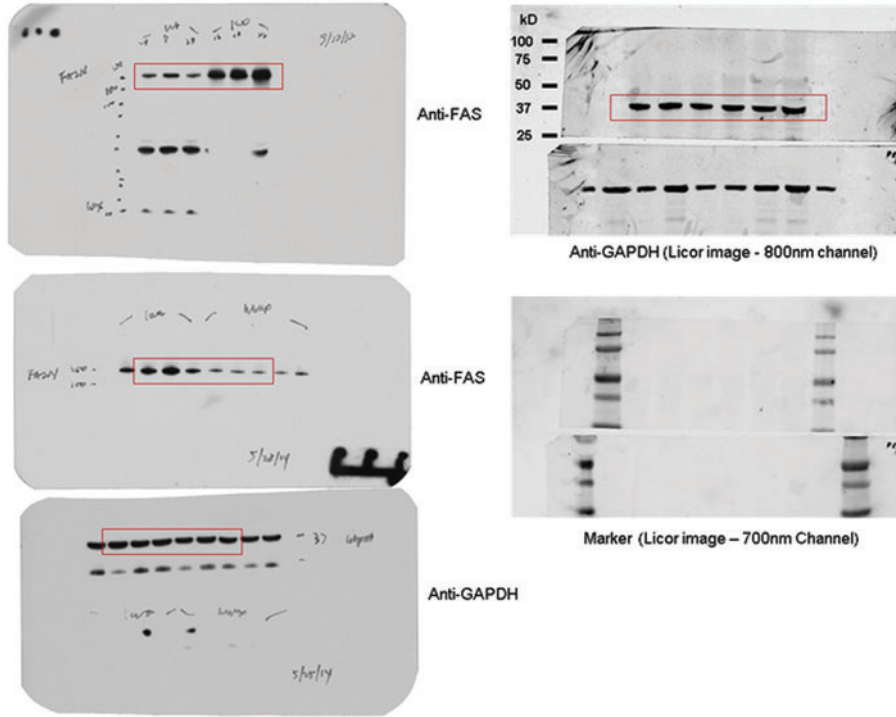

SUPPLEMENTARY FIG. S17. Original Western blots of Figure 5D. Red boxes delineate cropped area.
