# Supplementary material
Source: PubMed Central journal article supplement (PMC5563925)
Supplement: Supp_Figure15.pdf [file Supp_Figure15.pdf]

Figure 5A

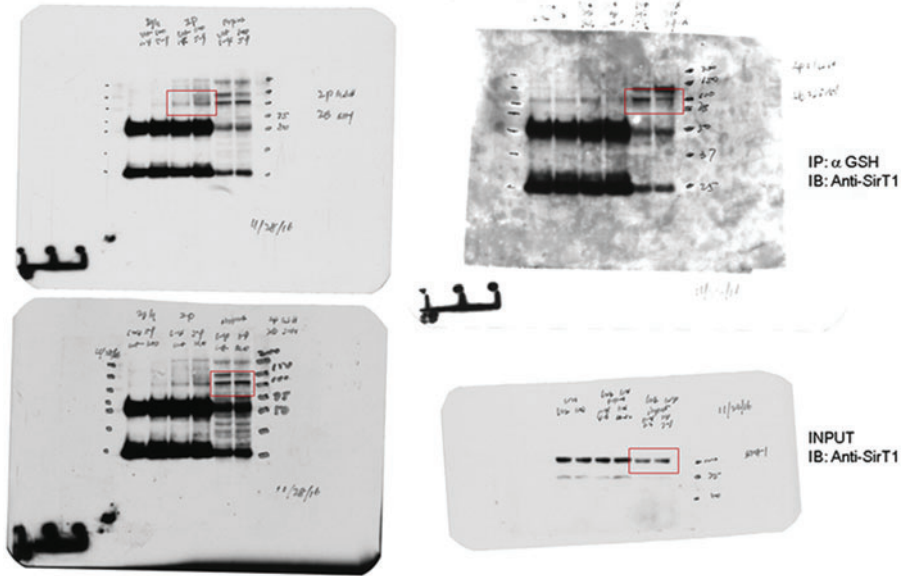

SUPPLEMENTARY FIG. S15. Original Western blots of Figure 5A. Red boxes delineate cropped area.
