# Supplementary material
Source: PubMed Central journal article supplement (PMC5563925)
Supplement: Supp_Figure16.pdf [file Supp_Figure16.pdf]

Figure 5B

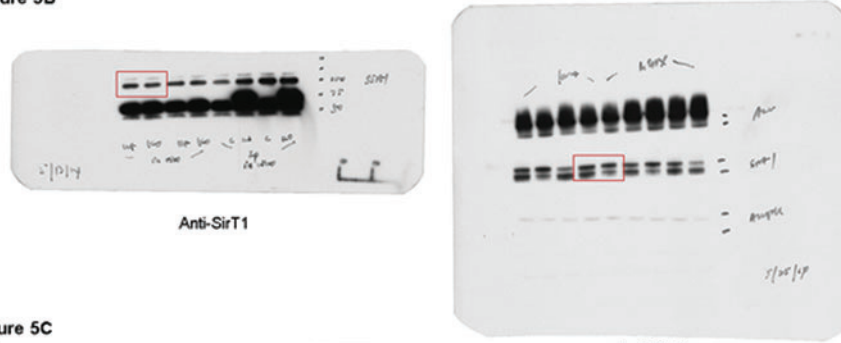

Figure 5C

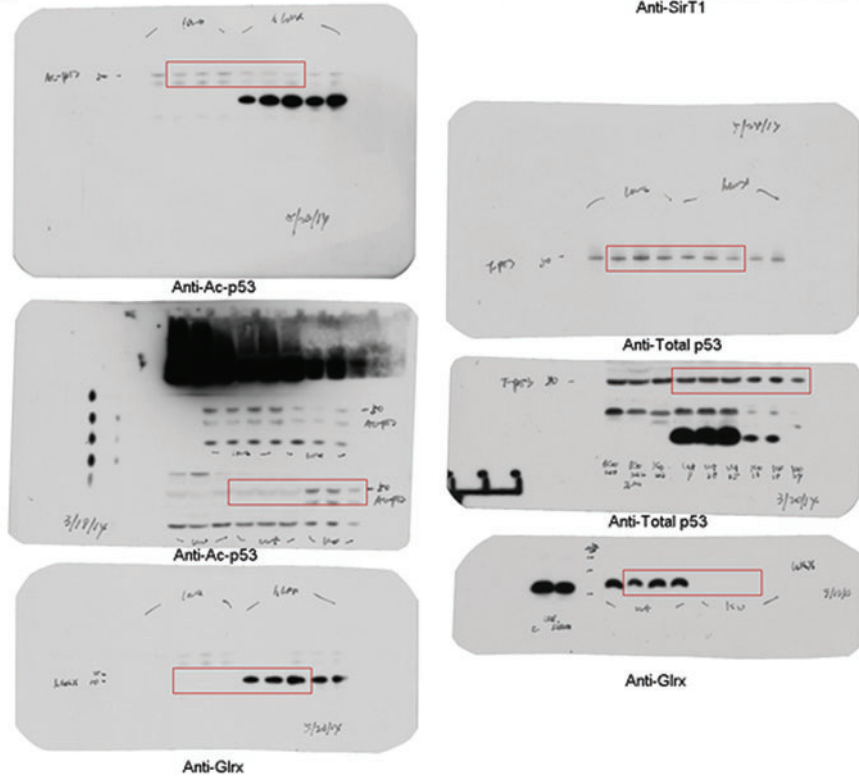

SUPPLEMENTARY FIG. S16. Original Western blots of Figure 5B, C. Red boxes delineate cropped area.
