# Supplementary material
Source: PubMed Central journal article supplement (PMC5563925)
Supplement: Supp_Figure17.pdf [file Supp_Figure17.pdf]

Figure 5D

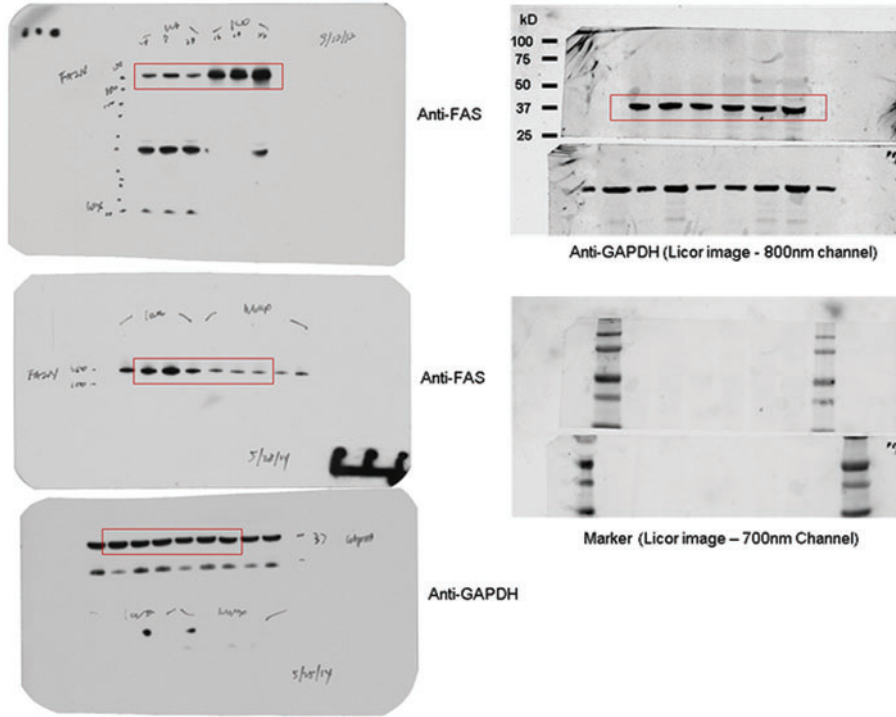

SUPPLEMENTARY FIG. S17. Original Western blots of Figure 5D. Red boxes delineate cropped area.
