# Supplementary material
Source: PubMed Central journal article supplement (PMC5563925)
Supplement: Supp_Figure18.pdf [file Supp_Figure18.pdf]

Figure 6-7

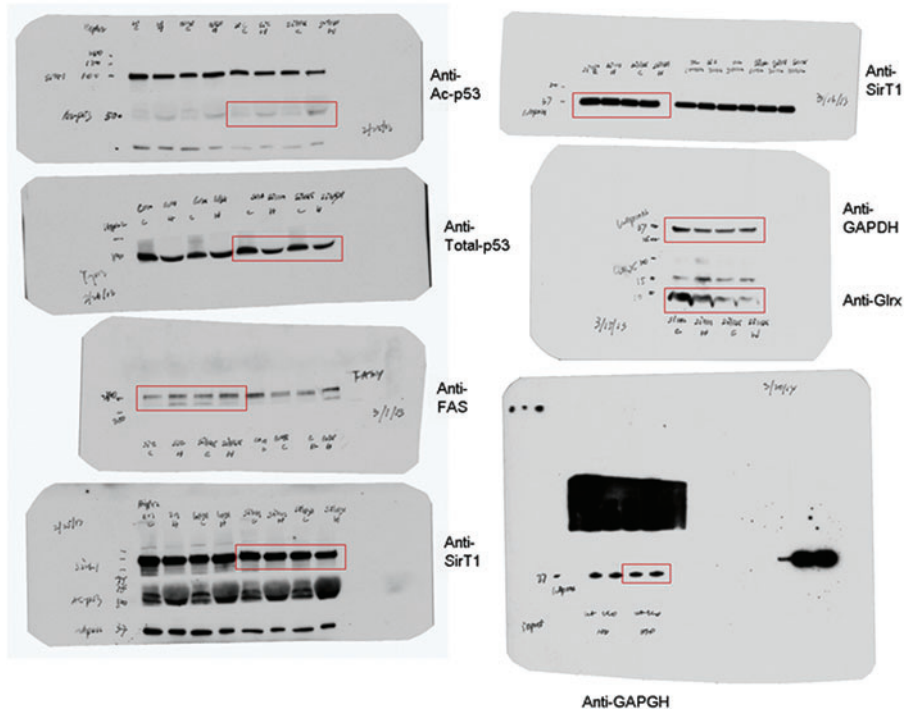

SUPPLEMENTARY FIG. S18. Original Western blots of Figures 6 and 7. Red boxes delineate cropped area.
