# Supplementary material
Source: PubMed Central journal article supplement (PMC5563925)
Supplement: Supp_Figure19.pdf [file Supp_Figure19.pdf]

Figure 6

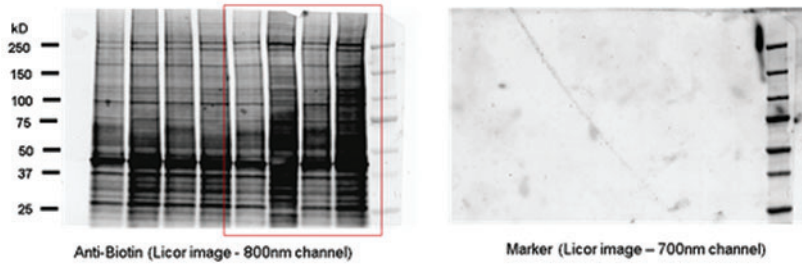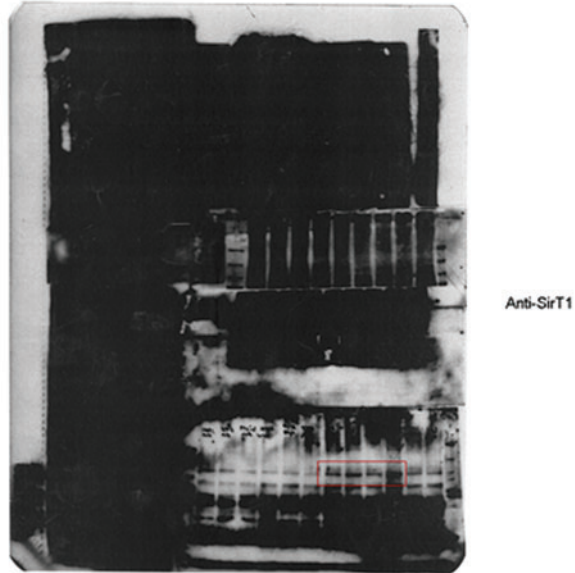

Figure 7

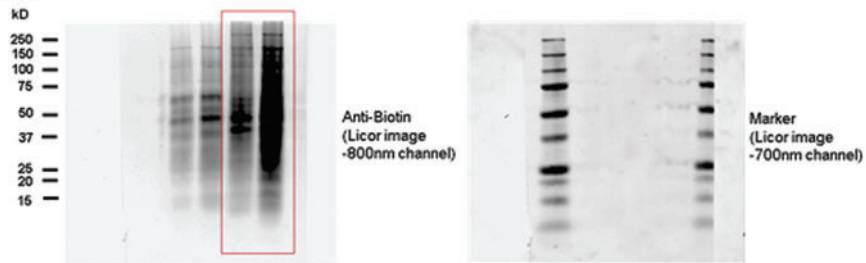

SUPPLEMENTARY FIG. S19. Original Western blots of Figures 6 and 7. Red boxes delineate cropped area.
