# Supplementary material
Source: PubMed Central journal article supplement (PMC5563925)
Supplement: Supp_Table1.pdf [file Supp_Table1.pdf]

SUPPLEMENTARY TABLE S1. METABOLIC PARAMETERS OF WILD TYPE AND *GLRX*<sup>-/-</sup> MICE  
FED NORMAL DIET AT 8 MONTHS OF AGE

| <i>Parameter</i>                 | <i>WT</i>      | <i>Glr</i> <sup>-/-</sup> |
|----------------------------------|----------------|---------------------------|
| Body weight (g)                  | 40.49 ± 8.26   | <b>52.48 ± 4.35*</b>      |
| MRI% fat/weight (% fat mass)     | 28.70 ± 8.17   | <b>41.73 ± 1.66*</b>      |
| Food intake (g/day)              | 3.07 ± 0.3     | 2.96 ± 0.5                |
| Liver weight (g)                 | 1.61 ± 0.51    | <b>2.49 ± 0.37*</b>       |
| Liver cholesterol (mg/g liver)   | 11.09 ± 2.93   | <b>23.51 ± 6.26*</b>      |
| Liver triglycerides (mg/g liver) | 13.96 ± 2.49   | <b>28.67 ± 7.75*</b>      |
| Plasma triglycerides (mg/dl)     | 33.20 ± 3.81   | <b>58.15 ± 23.36*</b>     |
| Plasma cholesterol (mg/dl)       | 130.81 ± 16.96 | <b>198.94 ± 53.66**</b>   |
| Fed glucose (mg/dl)              | 145.13 ± 20.77 | 145.63 ± 32.95            |
| Fasting glucose (mg/dl)          | 123.83 ± 23.68 | 126.63 ± 15.05            |
| Fed insulin (mg/L)               | 1.24 ± 0.36    | 1.42 ± 0.17               |
| Fasting insulin (mg/L)           | 0.99 ± 0.41    | 0.91 ± 0.17               |
| AST activity (mU/ml)             | 122.36 ± 46.10 | 146.61 ± 46.21            |
| ALT activity (mU/ml)             | 6.03 ± 2.70    | <b>9.92 ± 5.09*</b>       |
| Respiratory exchange ratio       | 0.79 ± 0.06    | 0.77 ± 0.04               |

Values represent means ± SD, *N* = 8–10. Mann–Whitney *U* test was used, \**p* < 0.05, \*\**p* < 0.01.

Values in bold represent statistically significant changes in *Glr*<sup>-/-</sup> mice.

ALT, alanine aminotransferase; AST, aspartate aminotransferase; MRI, magnetic resonance imaging; WT, wild type.
