# Supplementary material
Source: PubMed Central journal article supplement (PMC5563925)
Supplement: Supp_Table2.pdf [file Supp_Table2.pdf]

SUPPLEMENTARY TABLE S2. METABOLIC PARAMETERS OF WILD TYPE AND  $GLRX^{-/-}$  MICE FED HIGH-FAT DIET FOR 3 MONTHS

| <i>Parameter</i>                 | <i>WT</i>      | <i>Glx<sup>-/-</sup></i> |
|----------------------------------|----------------|--------------------------|
| Body weight (g)                  | 39.88 ± 6.44   | <b>49.93 ± 1.91**</b>    |
| MRI% fat/weight (% fat mass)     | 24.46 ± 10.17  | <b>42.17 ± 2.99*</b>     |
| Liver cholesterol (mg/g liver)   | 23.78 ± 8.10   | <b>38.44 ± 2.27*</b>     |
| Liver triglycerides (mg/g liver) | 21.17 ± 3.47   | <b>37.86 ± 4.22*</b>     |
| Plasma triglycerides (mg/dl)     | 41.32 ± 4.02   | <b>77.27 ± 29.39*</b>    |
| Plasma cholesterol (mg/dl)       | 179.93 ± 47.38 | <b>263.55 ± 71.20*</b>   |
| Fed glucose (mg/dl)              | 147.25 ± 9.43  | 152.14 ± 21.06           |
| AST activity (mU/ml)             | 182.59 ± 65.56 | <b>298.40 ± 44.90**</b>  |
| ALT activity (mU/ml)             | 10.63 ± 6.94   | <b>30.48 ± 18.53*</b>    |

Values represent means ± SD,  $N=8-10$ . Mann-Whitney  $U$  test was used, \* $p < 0.05$ , \*\* $p < 0.01$ .  
 Values in bold represent statistically significant changes in  $Glx^{-/-}$  mice.
