# Supplementary material
Source: PubMed Central journal article supplement (PMC5563925)
Supplement: Supp_Table3.pdf [file Supp_Table3.pdf]

SUPPLEMENTARY TABLE S3. ANTIBODIES

| <i>Antigen</i>              | <i>Source</i>     | <i>Dilution</i> | <i>Product No.</i> | <i>Manufacturer</i>     |
|-----------------------------|-------------------|-----------------|--------------------|-------------------------|
| ACC                         | Rabbit polyclonal | 1:1000 WB       | #3662              | Cell Signaling, MA      |
| p-ACC                       | Rabbit polyclonal | 1:1000 WB       | #3661              | Cell Signaling, MA      |
| AMPK                        | Rabbit monoclonal | 1:1000 WB       | #5831              | Cell Signaling, MA      |
| p-AMPK                      | Rabbit monoclonal | 1:1000 WB       | #2535              | Cell Signaling, MA      |
| $\alpha$ -biotin HRP-linked | Goat polyclonal   | 1:1000 WB       | #7075              | Cell Signaling, MA      |
| FAS                         | Mouse monoclonal  | 1:5000 WB       | 610962             | BD Biosciences          |
| GAPDH                       | Rabbit monoclonal | 1:1000 WB       | #2118              | Cell Signaling, MA      |
| Grx                         | Rabbit polyclonal | 1:1000 WB       | Custom             | Bethyl Laboratories, TX |
| $\alpha$ -GSH adducts       | Mouse monoclonal  | 1:200 IHC       | 101-A-100          | Virogen, MA             |
| Ac-p53 (K379)               | Rabbit polyclonal | 1:1000 WB       | #2570              | Cell Signaling, MA      |
| Ac-p53 (K382)               | Rabbit polyclonal | 1:1000 WB       | #2525              | Cell Signaling, MA      |
| p53                         | Mouse monoclonal  | 1:1000 WB       | sc-126             | Santa Cruz, TX          |
| SirT1                       | Mouse monoclonal  | 1:5000 WB       | ab 110304          | Abcam                   |
| SREBP-1C (K-10)             | Rabbit polyclonal | 1:1000 WB       | sc-367             | Santa Cruz, TX          |
| SREBP-1C (2A4)              | Mouse monoclonal  | 1:1000 WB       | sc-13551           | Santa Cruz, TX          |
| SREBP-1C (H160)             | Rabbit polyclonal | 1:1000 WB       | sc-8984            | Santa Cruz, TX          |
