# Supplementary material
Source: PubMed Central journal article supplement (PMC5563925)
Supplement: Supp_Table4.pdf [file Supp_Table4.pdf]

SUPPLEMENTARY TABLE S4. TAQMAN ASSAYS

---

| <i>Gene</i> | <i>TaqMan assay</i> |
|-------------|---------------------|
| Actb        | Mm00607939_s1       |
| Acc1/Acaca  | Mm01304257_m1       |
| Acadm       | Mm01323360_g1       |
| Cd36        | Mm01135198_m1       |
| Cpt1a       | Mm01231183_m1       |
| Cyp4a10     | Mm01188913_g1       |
| Cyp7a1      | Mm00484150_m1       |
| Fasn        | Mm00662319_m1       |
| Glrx        | Mm00728386_m1       |
| Glrx-2      | Mm00469836_m1       |
| Hmgcr       | Mm01282499_m1       |
| Il1b        | Mm00434228_m1       |
| Il6         | Mm00446190_m1       |
| Ldlr        | Mm01177349_m1       |
| Ppara       | Mm00440939_m1       |
| Scd1        | Mm00772290_m1       |
| Srebf1      | Mm00550338_m1       |
| Srebf2      | Mm01306292_m1       |
| Tnfa        | Mm00443258_m1       |
| Trx-1       | Mm00726847_s1       |
| Trx-2       | Mm00444931_m1       |
| Txnip       | Mm01265659_g1       |

---
